# Supplementary material for: Ligand-regulated catalytic activity in fluorescent gold nanoclusters
Source: Royal Society of Chemistry journal article supplement (doi:10.1039/d4qi01828a), 2024-01-01
Supplement: d4qi01828a2.pdf [file d4qi01828a2.pdf]

## Supplementary Information

# Ligand-Regulated Catalytic Activity in Fluorescent Gold Nanoclusters

*Wenxuan Yang,<sup>1</sup> Shenming Wang,<sup>1</sup> Xiaoyun Wei, Zhenzhen Feng,<sup>2</sup> Guangyong Qin,<sup>1</sup> Jian Mao,<sup>1</sup> Zheng Zhen,<sup>1</sup> Xintong Miao,<sup>1</sup> Yifeng Cheng,<sup>1</sup> Xiaojuan Wang,<sup>1</sup> Huang Fang,<sup>1</sup> and Hua He <sup>\*1</sup>*

<sup>1</sup> State Key Laboratory of Heavy Oil Processing and College of Chemistry and Chemical Engineering, China University of Petroleum (East China), Qingdao 266580, China

Email: [huahe@upc.edu.cn](mailto:huahe@upc.edu.cn)

<sup>2</sup> Technical Center of Qingdao Customs District, Qingdao 266500, China

## **EXPERIMENTAL METHODS**

### **Synthesis of MPA-AuNCs**

MPA-AuNCs were synthesized following established protocols.<sup>1</sup> An aqueous solution of  $\text{HAuCl}_4$  (20 mM, 0.25 mL) and mercaptopropionic acid (MPA) (5 mM, 2 mL) was added to 2.35 mL of water and stirred at room temperature for 5 minutes. Subsequently, 0.3 mL of NaOH solution (1 M) was added, followed by 0.1 mL of  $\text{NaBH}_4$  solution, prepared by dissolving 43 mg of  $\text{NaBH}_4$  in 10 mL of 0.2 M NaOH. The reaction was conducted in the dark and stirred at room temperature for 3 hours. The resulting MPA-AuNCs were then collected.

### **Synthesis of GSH-AuNCs**

GSH-AuNCs were synthesized based on previously reported methods.<sup>2</sup> Briefly, a freshly prepared solution of  $\text{HAuCl}_4 \cdot 4\text{H}_2\text{O}$  (20 mM, 500  $\mu\text{L}$ ) was mixed with glutathione (GSH) (20 mM, 1 mL), and the mixture was maintained at 70°C for 12 hours. After cooling, the initial GSH-AuNCs product was obtained. This product was then filtered using ultrafiltration tubes of 30 kDa and 3 kDa at 10,000 rpm, yielding gold clusters with a molecular weight range of 3 kDa to 30 kDa.

### **Synthesis of KCK-AuNCs**

A freshly prepared KCK solution (20 mM, 0.5 mL) was mixed with TCEP (20 mM, 0.5 mL) and incubated in a dark water bath at 70°C for 15 minutes. A solution of  $\text{HAuCl}_4 \cdot 4\text{H}_2\text{O}$  (20 mM, 500  $\mu\text{L}$ ) was then quickly added, the mixture was homogenized, and the reaction was continued in the dark at 70°C for another 10 minutes. NaOH solution (1.5 M, 50  $\mu\text{L}$ ) and  $\text{NaBH}_4$  solution (0.1 M, 8  $\mu\text{L}$ ) were sequentially added to a glass vial and mixed thoroughly with a pipette. An additional 3.4 mL of ultrapure water was added to achieve a final concentration of 2 mmol/L of Au in the solution. The reaction was maintained at 70°C for 10 hours. The product was then filtered using

ultrafiltration tubes of 30 kDa and 3 kDa at 10,000 rpm, yielding gold clusters within a molecular weight range of 3 kDa to 30 kDa.

### **Synthesis of BSA-AuNCs**

BSA-AuNCs were synthesized as previously described.<sup>3</sup> H<sub>2</sub>AuCl<sub>4</sub>·4H<sub>2</sub>O (5 mL, 10 mM) was added to a BSA solution (5 mL, 50 mg/mL) at 37°C under vigorous stirring. After 2 minutes, 0.5 mL of NaOH solution (1 M) was added, and the mixture was incubated at 37°C for 12 hours. During this period, the solution color changed from light yellow to light brown, and finally to dark brown.

### **Characterizations of AuNCs**

All optical characterizations were conducted at room temperature, approximately 25 °C. Mass spectra were recorded using an Autoflex III smartbeam MALDI-TOF mass spectrometer. UV-Vis absorption spectra were recorded on a Shimadzu UV-2450 spectrophotometer. Fluorescence spectra and lifetime were measured with a FS5 fluorescence spectrophotometer (UK). TEM images were captured using a JEM-2100 transmission electron microscope operating at 200 kV to examine the morphology of the AuNCs.

### **Single molecule fluorescence imaging**

AuNCs were first immobilized on a cleaned coverslip, which was then adhered to a slide with two holes to form a reaction cell. The reactant solution was continuously supplied via a microfluidic syringe at a flow rate of 30 µL/min. Fluorescence was excited using a 532 nm laser on a Nikon total internal reflection fluorescence microscope (TIRFM). The emitted fluorescence was collected using a 100× objective (NA = 1.49) equipped with an integrated 1.5× magnification changer lens, a 570 nm dichroic mirror, and a 593/40 nm band-pass filter. Detection was performed using an Electron Multiplying Charge-Coupled Device (EMCCD; iXon 897, Andor, 16 µm/pixel). The EMCCD's gain and read-out rate were set at 300 and 10 MHz, respectively. Fluorescence

intensity was converted into photon counts using the electron/Analog Digital Units (ADU) conversion factor (DCF), EM gain, and quantum efficiency (QE). The relationship used was:  $\text{photons} = \text{ADU} \times \text{DCF} / (\text{QE} \times \text{gain})$ , where DCF was 12.02 and QE was approximately 92% for the 600-750 nm fluorescence range. Data was analyzed using a custom MATLAB program, which extracted single molecule signals from a  $7 \times 7$ -pixel region centered around the peak intensity. Fluorescence blinking events were identified by isolating signals that exceeded four times the standard deviation of the background fluorescence trajectory fluctuations.

**Movie S1**

**Movie S1.** Blinking from single particle catalysis

Figures S1-S14

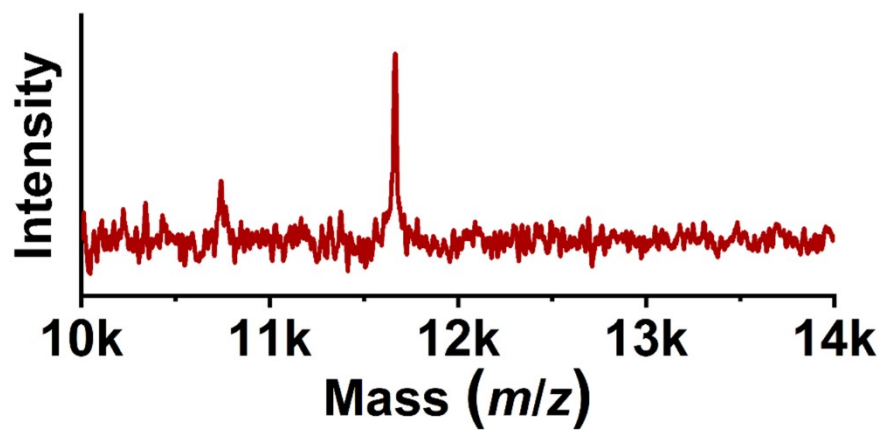

**Figure S1.** Mass spectrometry of KCK-AuNCs, showing a molecular weight consistent with  $\text{Au}_{25}(\text{KCK})_{18}$ .

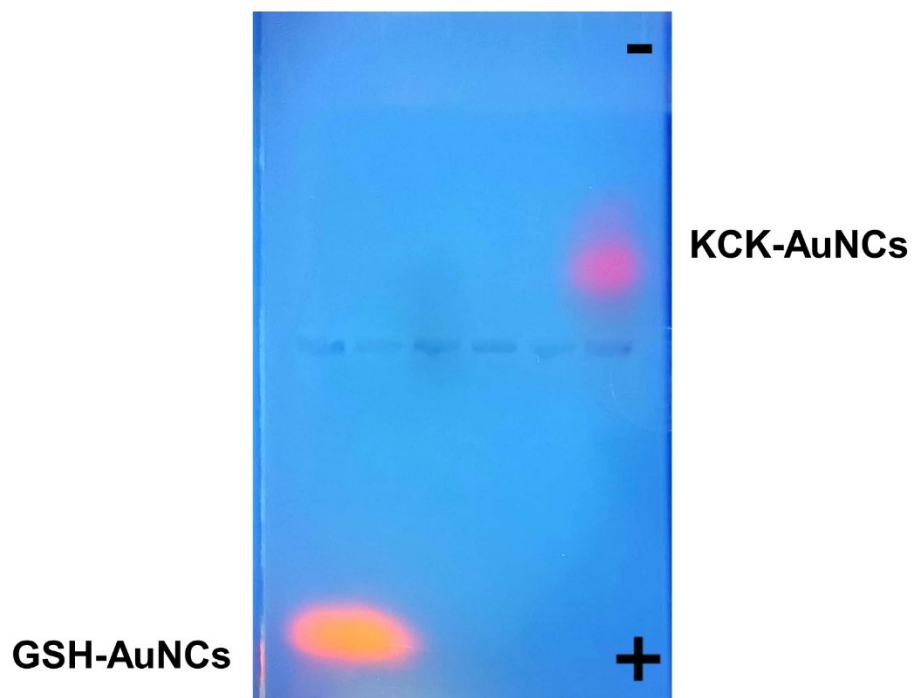

**Figure S2.** Electrophoresis photo of GSH-AuNCs and KCK-AuNCs.

**GSH-AuNCs**

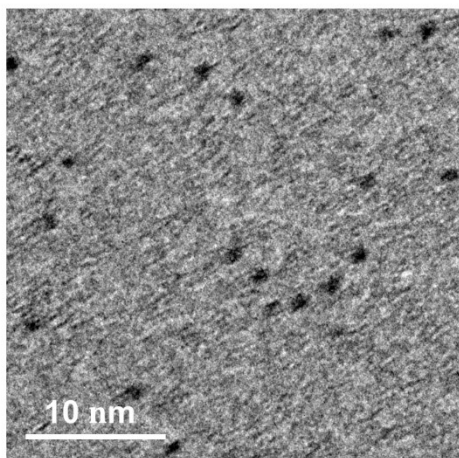

**KCK-AuNCs**

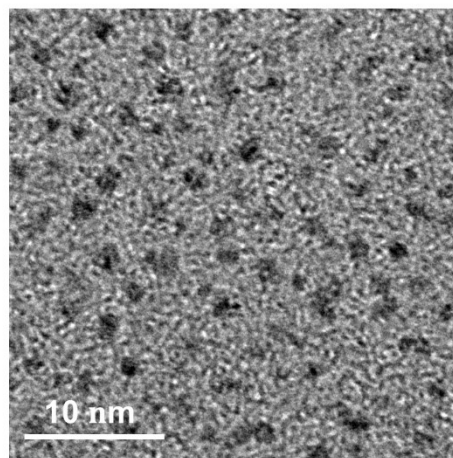

**Figure S3.** TEM images of (a) GSH-AuNCs and (b) KCK-AuNCs, showing their average size to be around 2 nm.



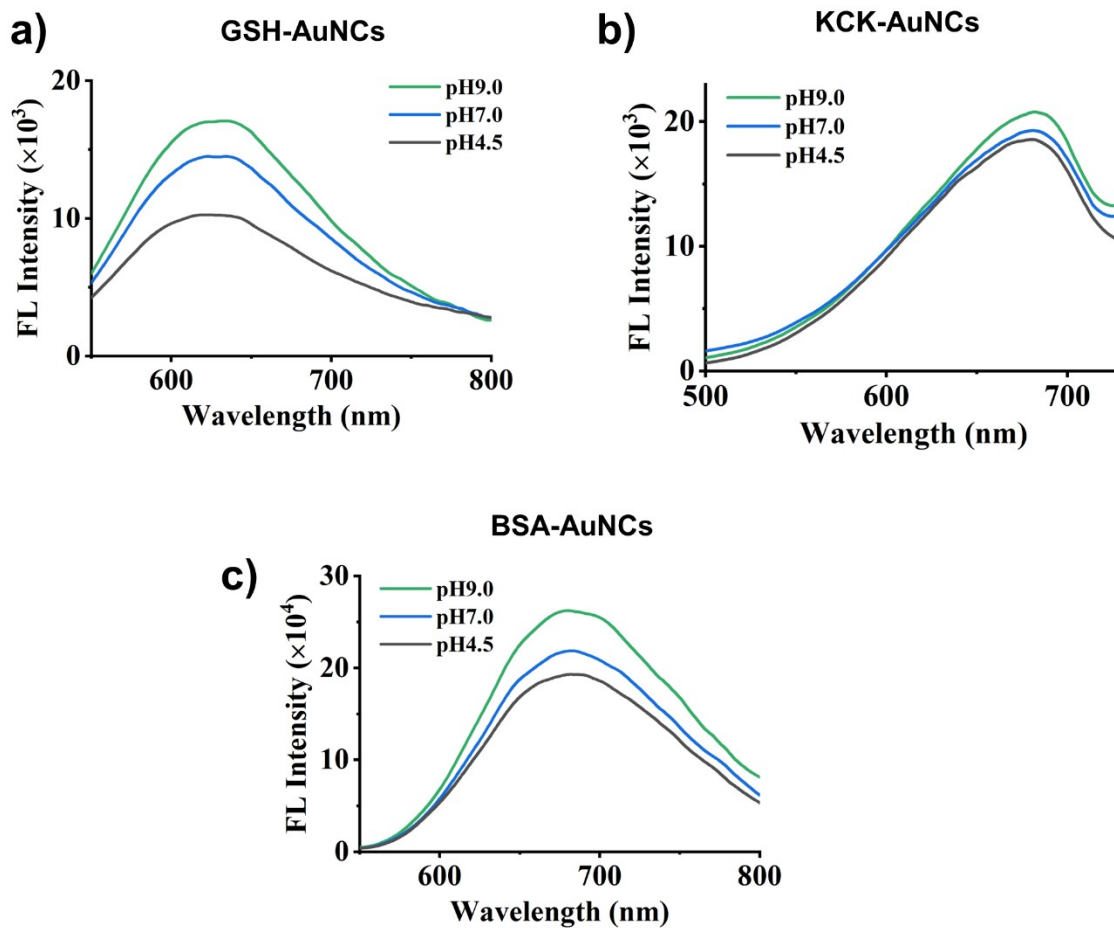

**Figure S4.** Effect of pH on the fluorescence of AuNCs. (a) GSH-AuNCs, (b) KCK-AuNCs, and (c) BSA-AuNCs.

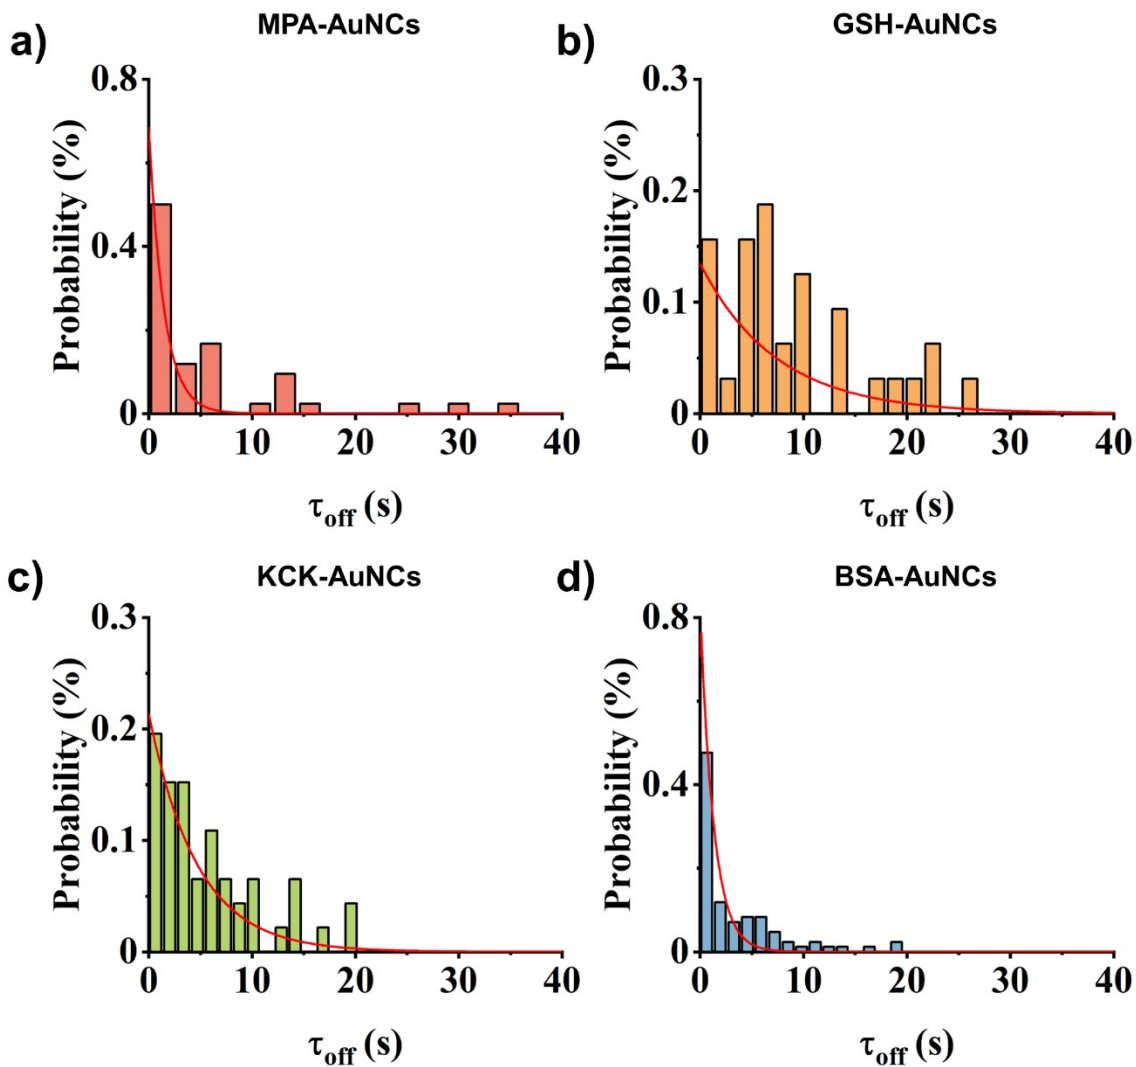

**Figure S5.** Distribution of off-time during the single-molecule catalytic process for the four AuNCs. (a) MPA-AuNCs, (b) GSH-AuNCs, (c) KCK-AuNCs, and (d) BSA-AuNCs.

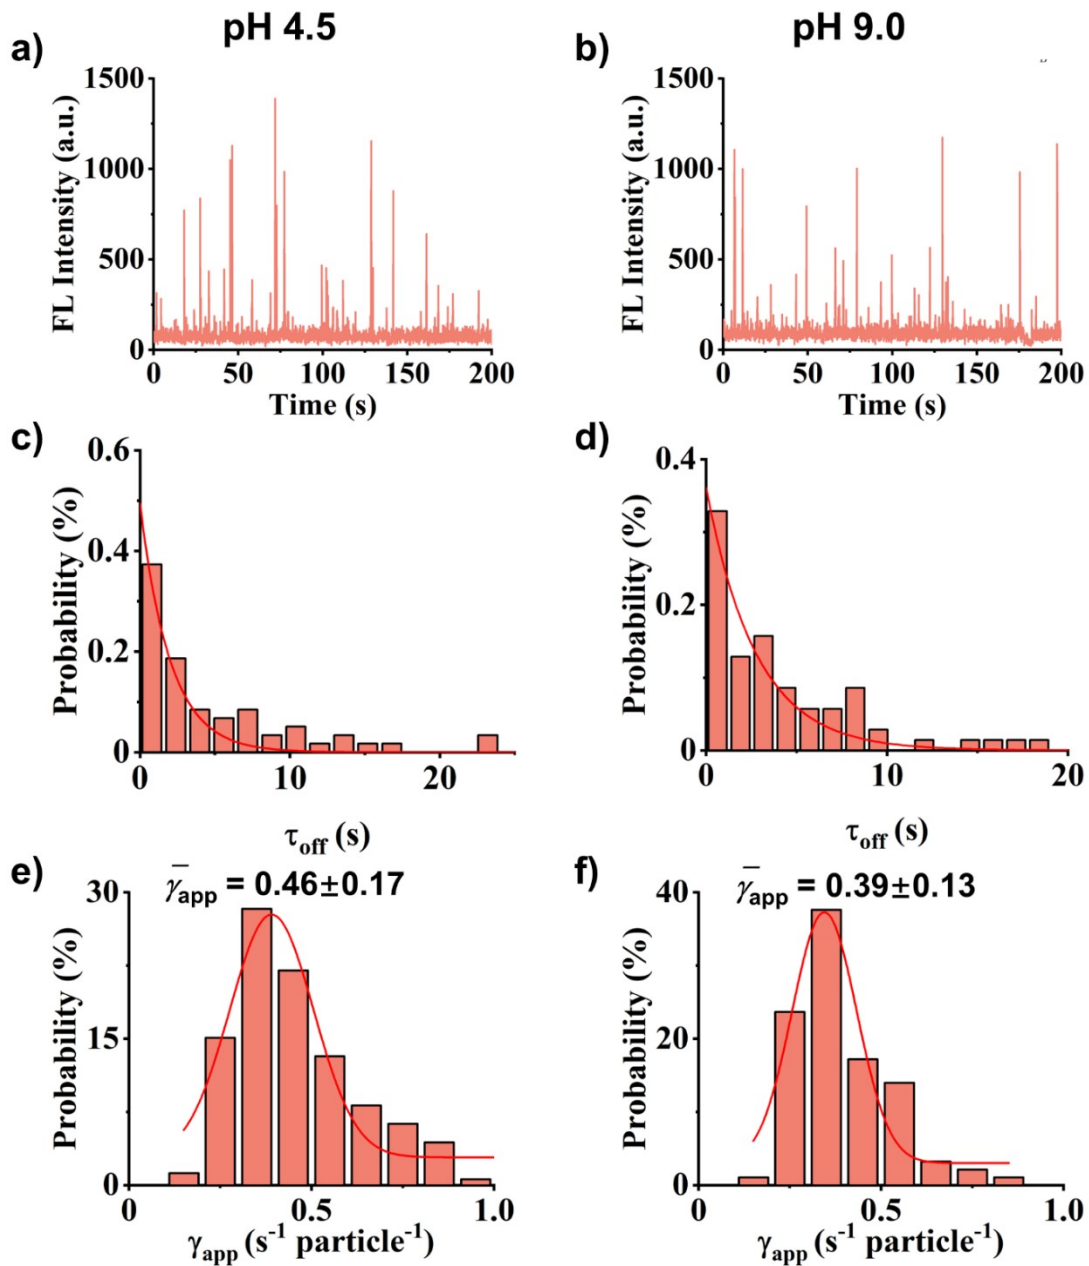

**Figure S6.** (a-b) Fluorescence intensity-time trajectories of individual MPA-AuNCs at pH 4.5 and pH 9.0, respectively. (c-d) Off-time distribution of MPA-AuNCs at pH 4.5 and pH 9.0, respectively. (e-f) Distribution of  $\gamma_{\text{app}}$  for MPA-AuNCs at pH 4.5 and pH 9.0, respectively, with average  $\gamma_{\text{app}}$  values of  $0.46 \pm 0.17$  at pH 4.5 and  $0.39 \pm 0.13$  at pH 9.0.

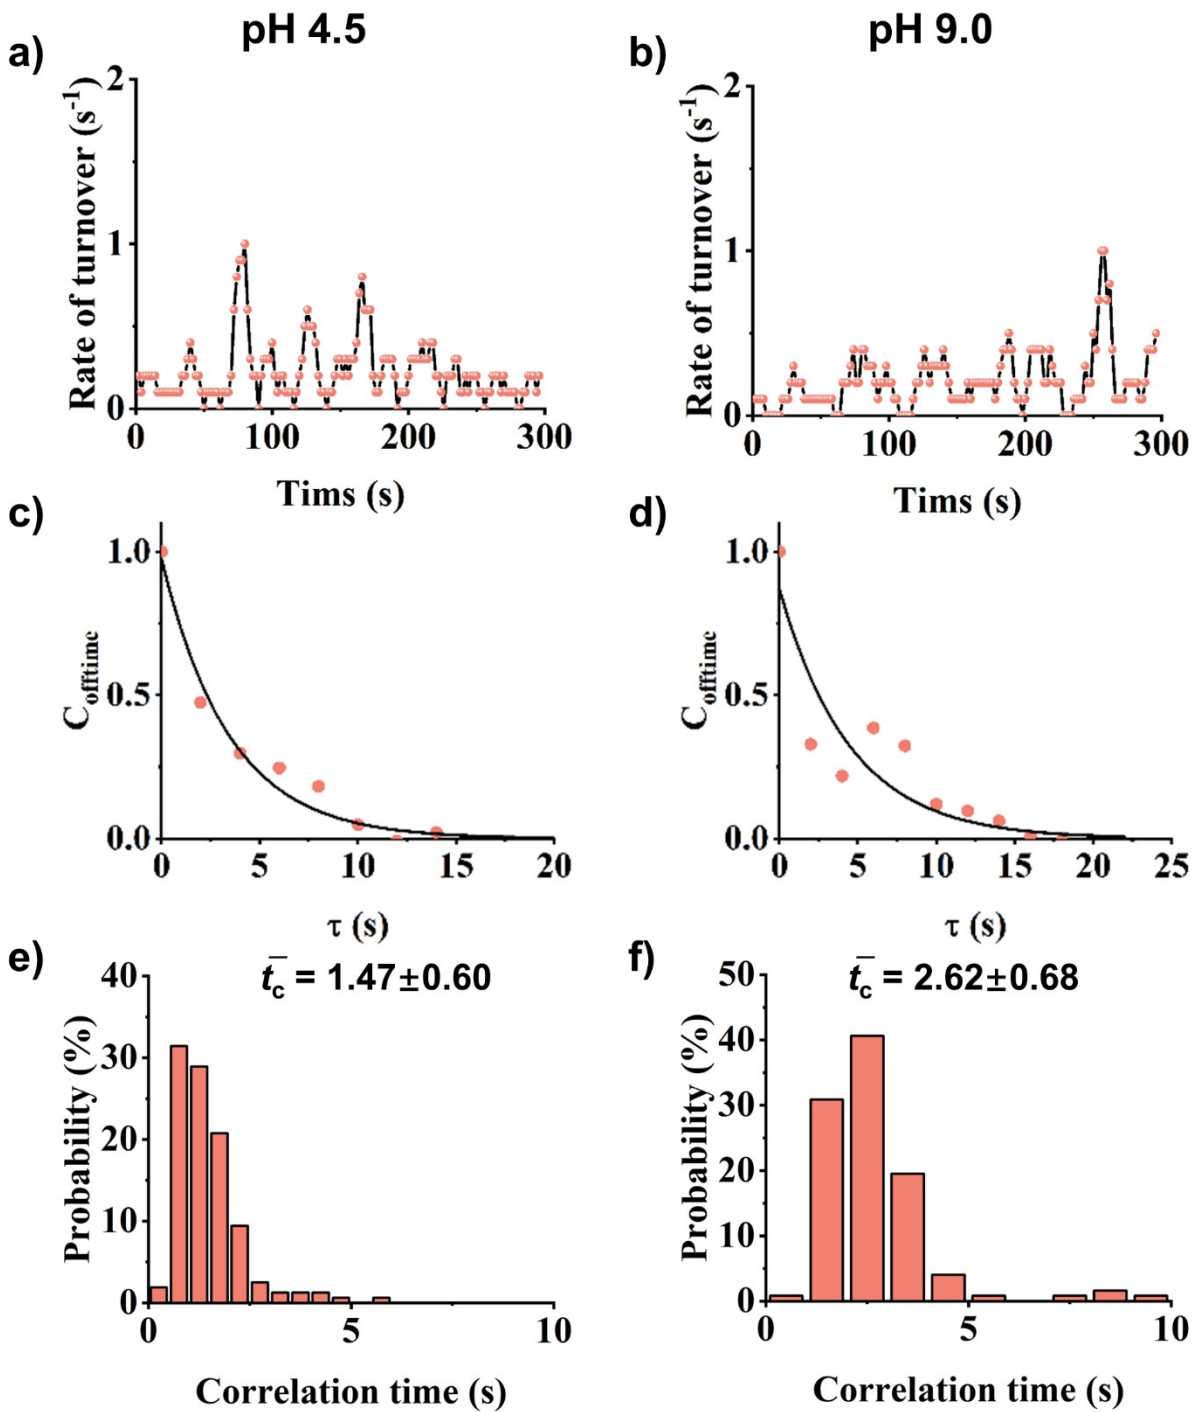

**Figure S7.** (a-b) Turnover rate of MPA-AuNCs over time at pH 4.5 and pH 9.0, respectively. (c-d) Autocorrelation function  $C_{\text{offtime}}$  of the microscopic reaction time  $\tau$  for MPA-AuNCs at pH 4.5 and pH 9.0, respectively. (e-f) Correlation time distribution of MPA-AuNCs at pH 4.5 and pH 9.0, respectively. The average correlation time ( $t_c$ ) is  $1.47 \pm 0.60$  s at pH 4.5, and  $2.62 \pm 0.68$  s at pH 9.0.

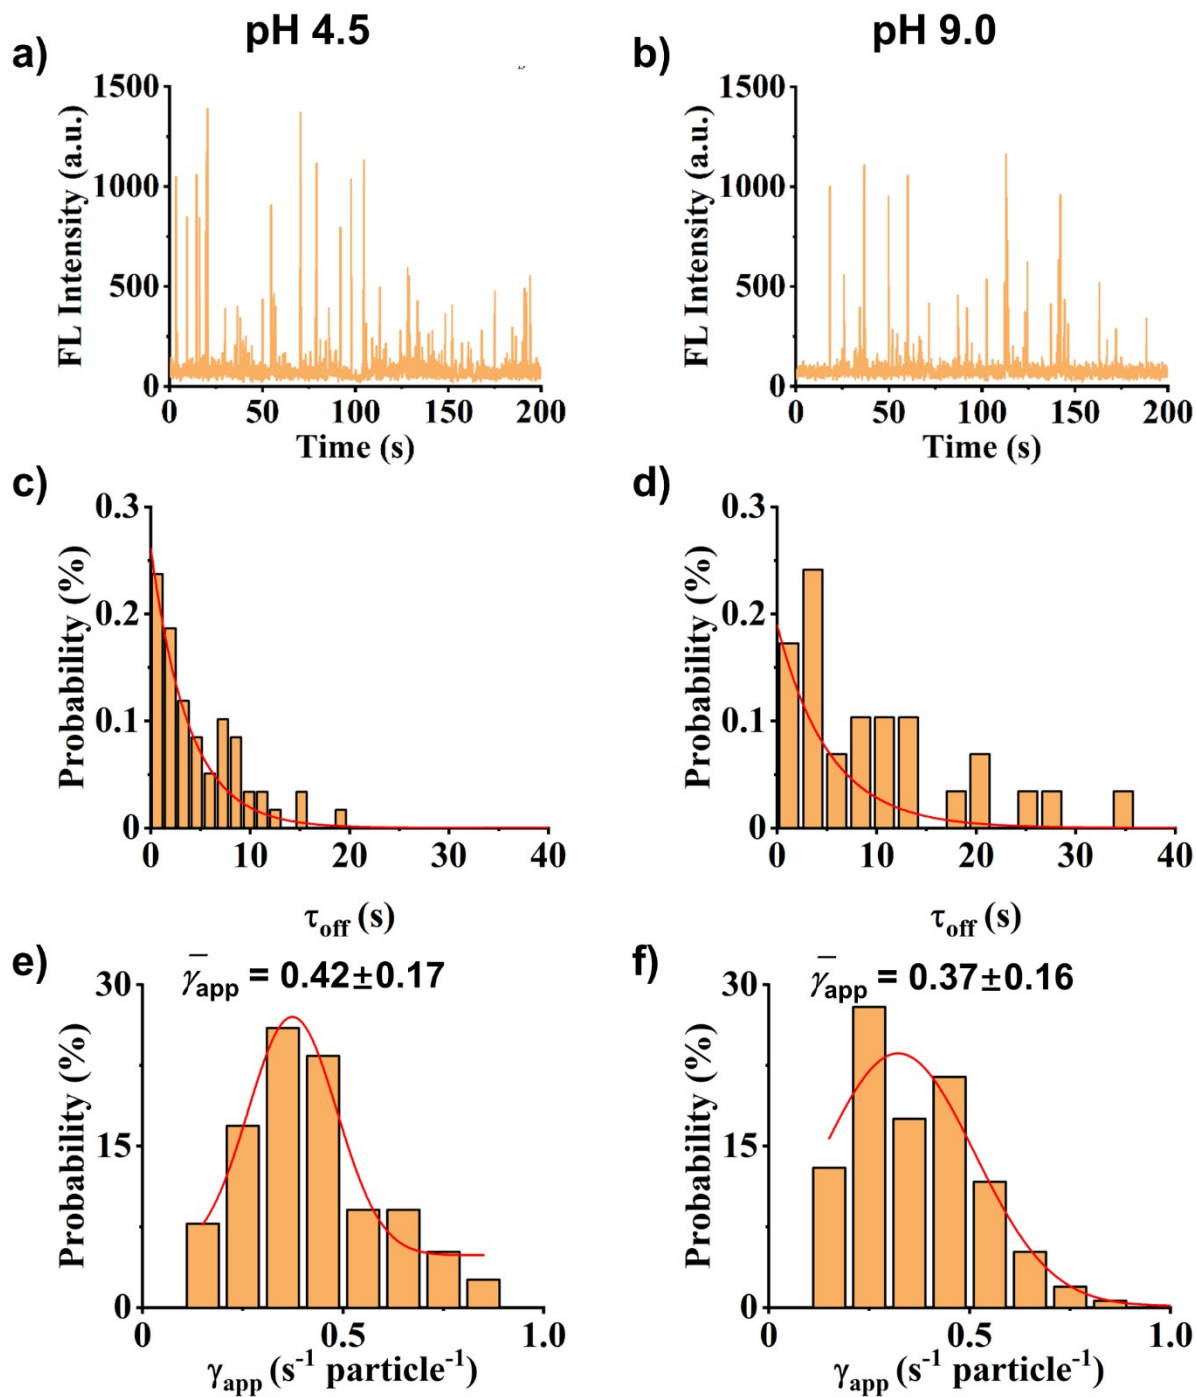

**Figure S8.** (a-b) Fluorescence intensity-time trajectories of individual GSH-AuNCs at pH 4.5 and pH 9.0, respectively. (c-d) Off-time distribution of GSH-AuNCs at pH 4.5 and pH 9.0, respectively. (e-f) Distribution of  $\gamma_{\text{app}}$  for GSH-AuNCs at pH 4.5 and pH 9.0, respectively, with average  $\gamma_{\text{app}}$  values of  $0.42 \pm 0.17$  at pH 4.5 and  $0.37 \pm 0.16$  at pH 9.0.

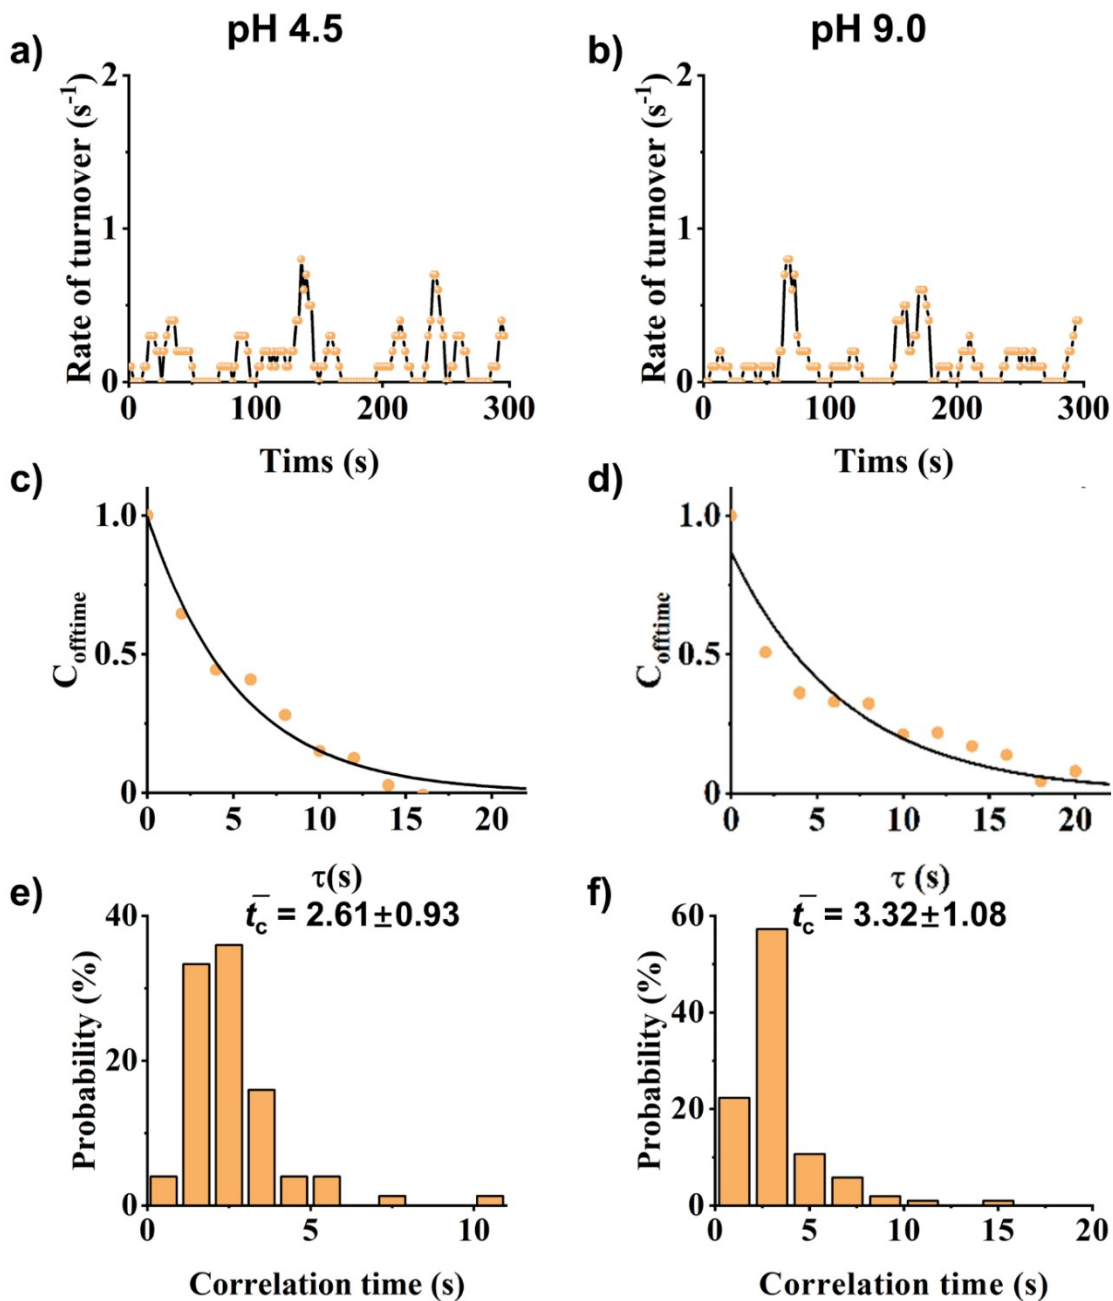

**Figure S9.** (a-b) Turnover rate of GSH-AuNCs over time at pH 4.5 and pH 9.0, respectively. (c-d) Autocorrelation function  $C_{\tau}(m)$  of the microscopic reaction time  $\tau$  for GSH-AuNCs at pH 4.5 and pH 9.0, respectively. (e-f) Correlation time distribution of GSH-AuNCs at pH 4.5 and pH 9.0, respectively. The average correlation time is  $2.61 \pm 0.93$  s at pH 4.5, and  $3.32 \pm 1.08$  s at pH 9.0.

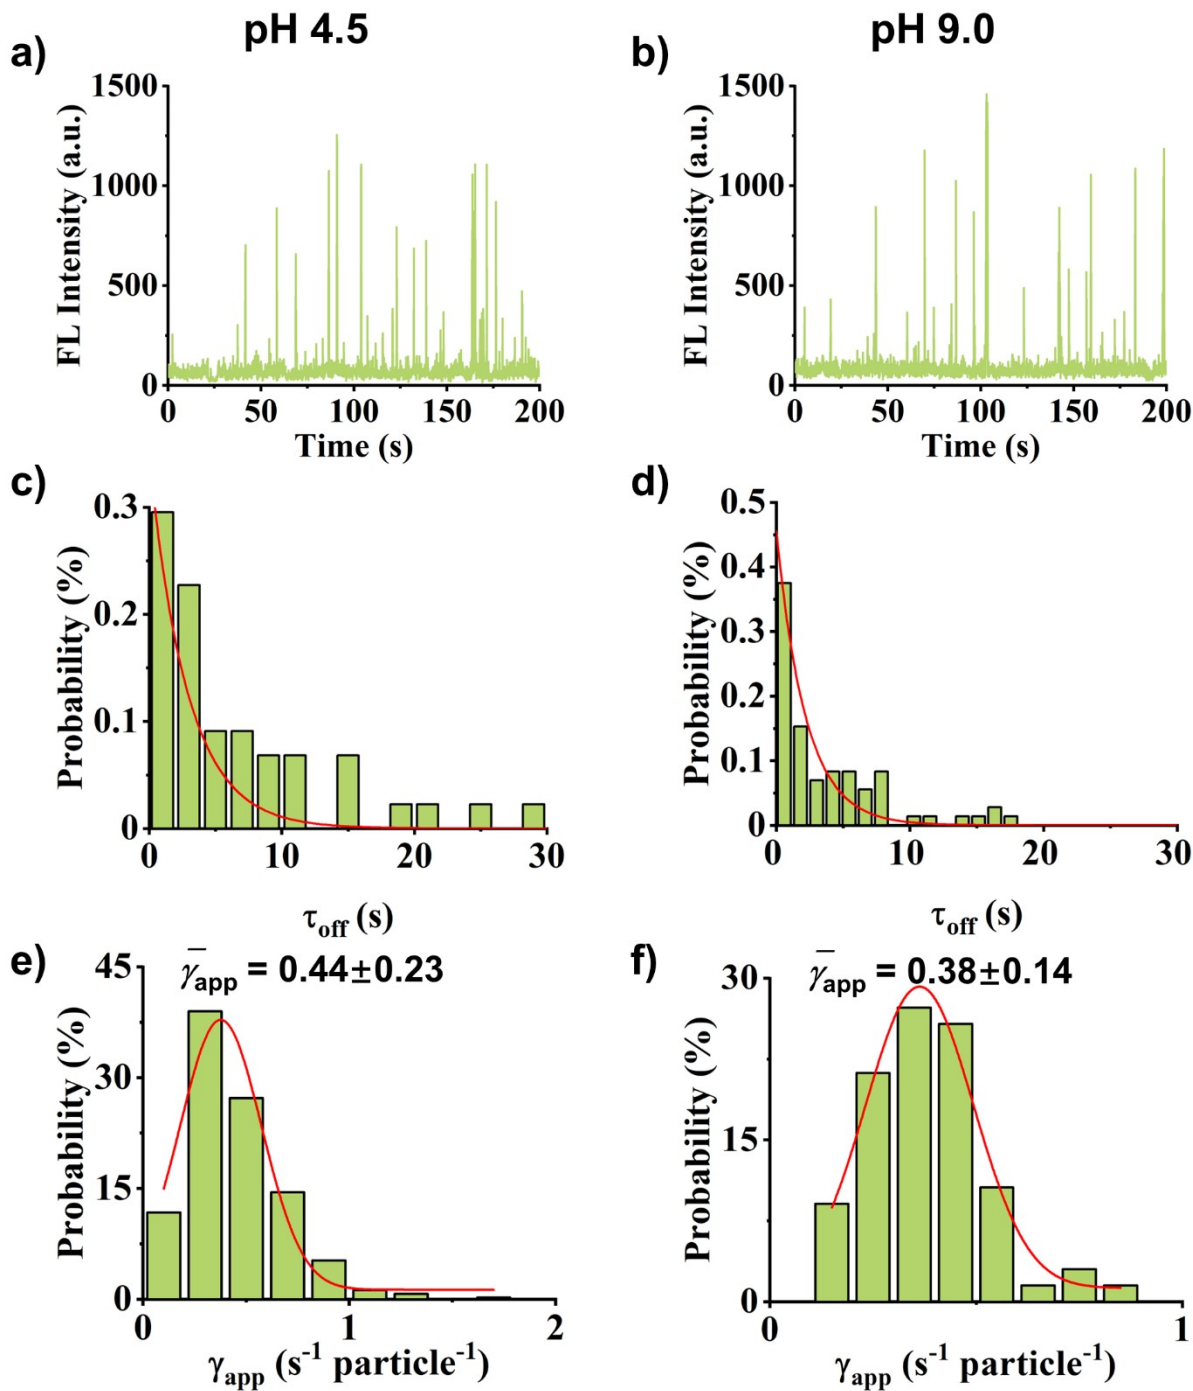

**Figure S10.** (a-b) Fluorescence intensity-time trajectories of individual KCK-AuNCs at pH 4.5 and pH 9.0, respectively. (c-d) Off-time distribution of KCK-AuNCs at pH 4.5 and pH 9.0, respectively. (e-f) Distribution of  $\gamma_{\text{app}}$  for KCK-AuNCs at pH 4.5 and pH 9.0, respectively, with average  $\gamma_{\text{app}}$  values of  $0.44 \pm 0.23$  at pH 4.5 and  $0.38 \pm 0.14$  at pH 9.0.

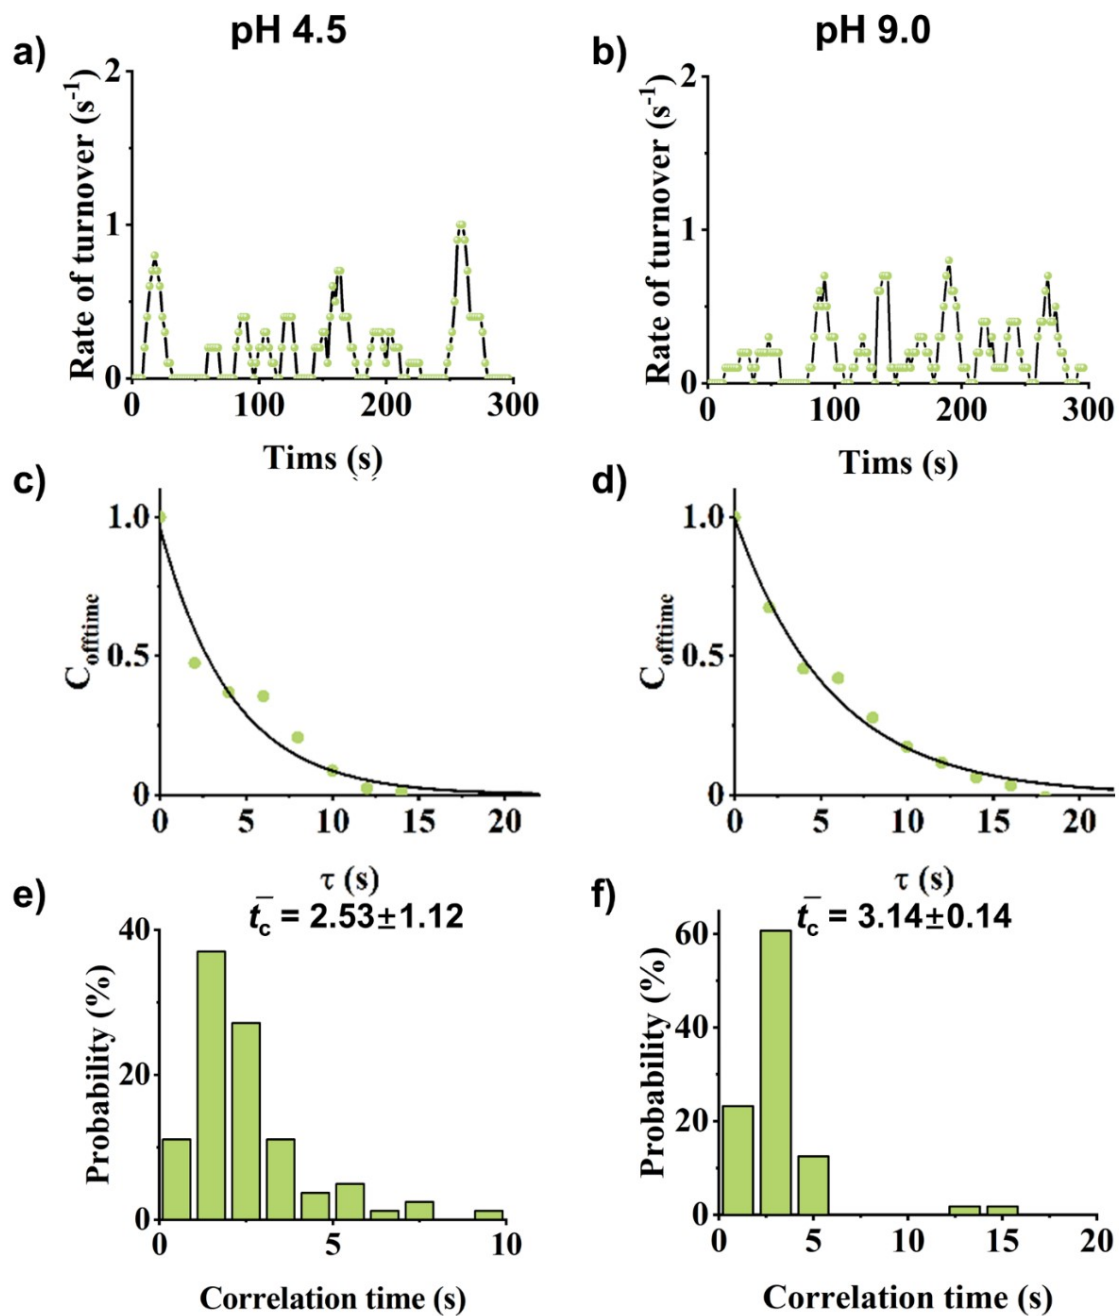

**Figure S11.** (a-b) Turnover rate of KCK-AuNCs over time at pH 4.5 and pH 9.0, respectively. (c-d) Autocorrelation function  $C_{\tau(m)}$  of the microscopic reaction time  $\tau$  for GSH-AuNCs at pH 4.5 and pH 9.0, respectively. (e-f) Correlation time distribution of GSH-AuNCs at pH 4.5 and pH 9.0, respectively, with average correlation times  $\bar{t}_c = 2.53 \pm 1.12$  s at pH 4.5 and  $\bar{t}_c = 3.14 \pm 0.14$  s at pH 9.0.



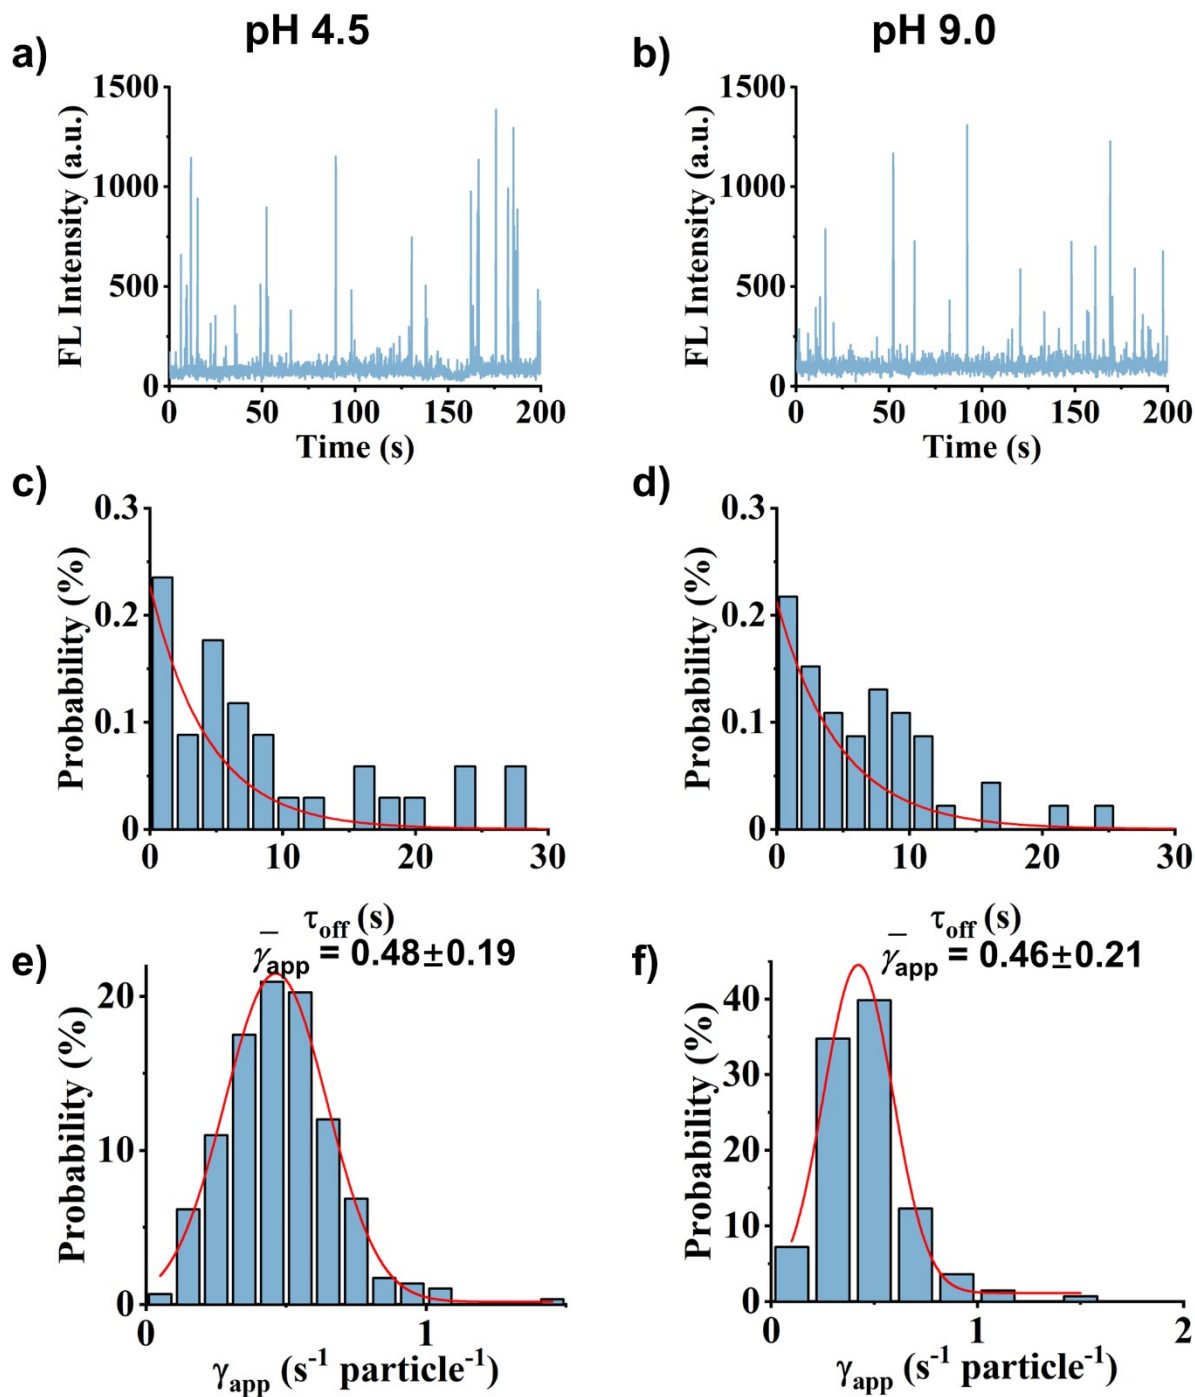

**Figure S12.** (a-b) Fluorescence intensity-time trajectories of individual BSA-AuNCs particles at pH 4.5 and pH 9.0, respectively. (c-d) Off-time distribution of BSA-AuNCs at pH 4.5 and pH 9.0, respectively. (e-f) Distribution of  $\gamma_{app}$  for BSA-AuNCs at pH 4.5 and pH 9.0, respectively, with average  $\gamma_{app}$  values of  $0.48 \pm 0.19$  at pH 4.5 and  $0.46 \pm 0.21$  at pH 9.0.

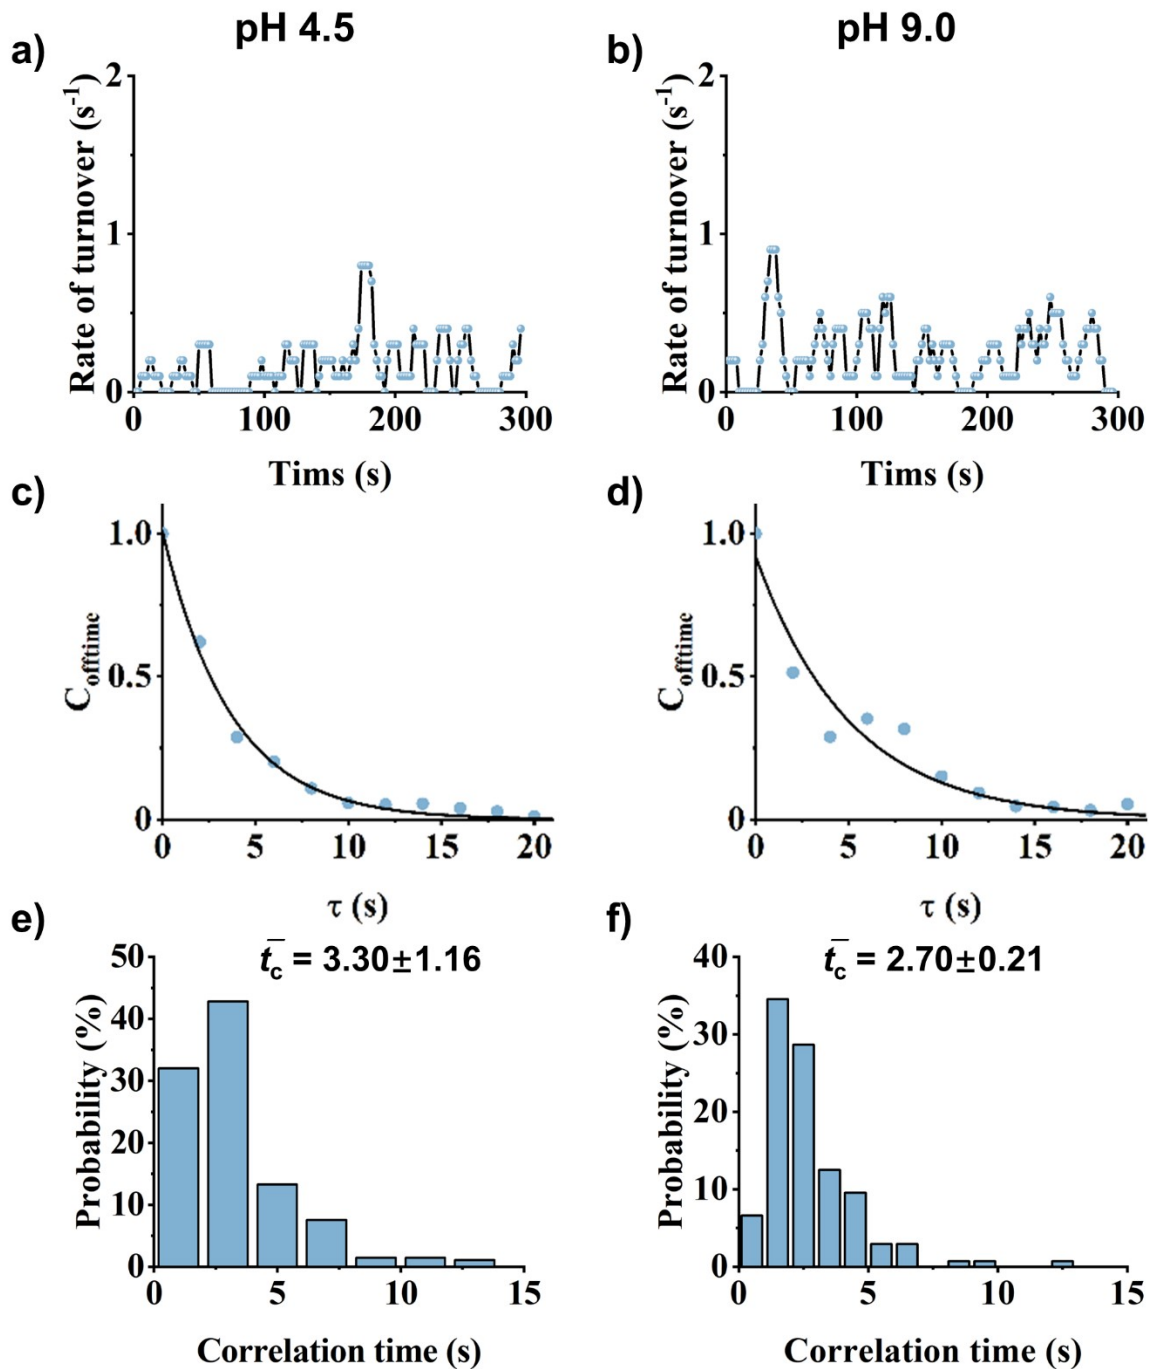

**Figure S13.** (a-b) Turnover rate of BSA-AuNCs over time at pH 4.5 and pH 9.0, respectively. (c-d) Autocorrelation function  $C_{\tau}(m)$  of the microscopic reaction time  $\tau$  for BSA-AuNCs at pH 4.5 and pH 9.0, respectively. (e-f) Correlation time distribution of BSA-AuNCs at pH 4.5 and pH 9.0, respectively, with average correlation times  $t_c = 3.30 \pm 1.16$  s at pH 4.5 and  $t_c = 2.70 \pm 0.21$  s at pH 9.0.

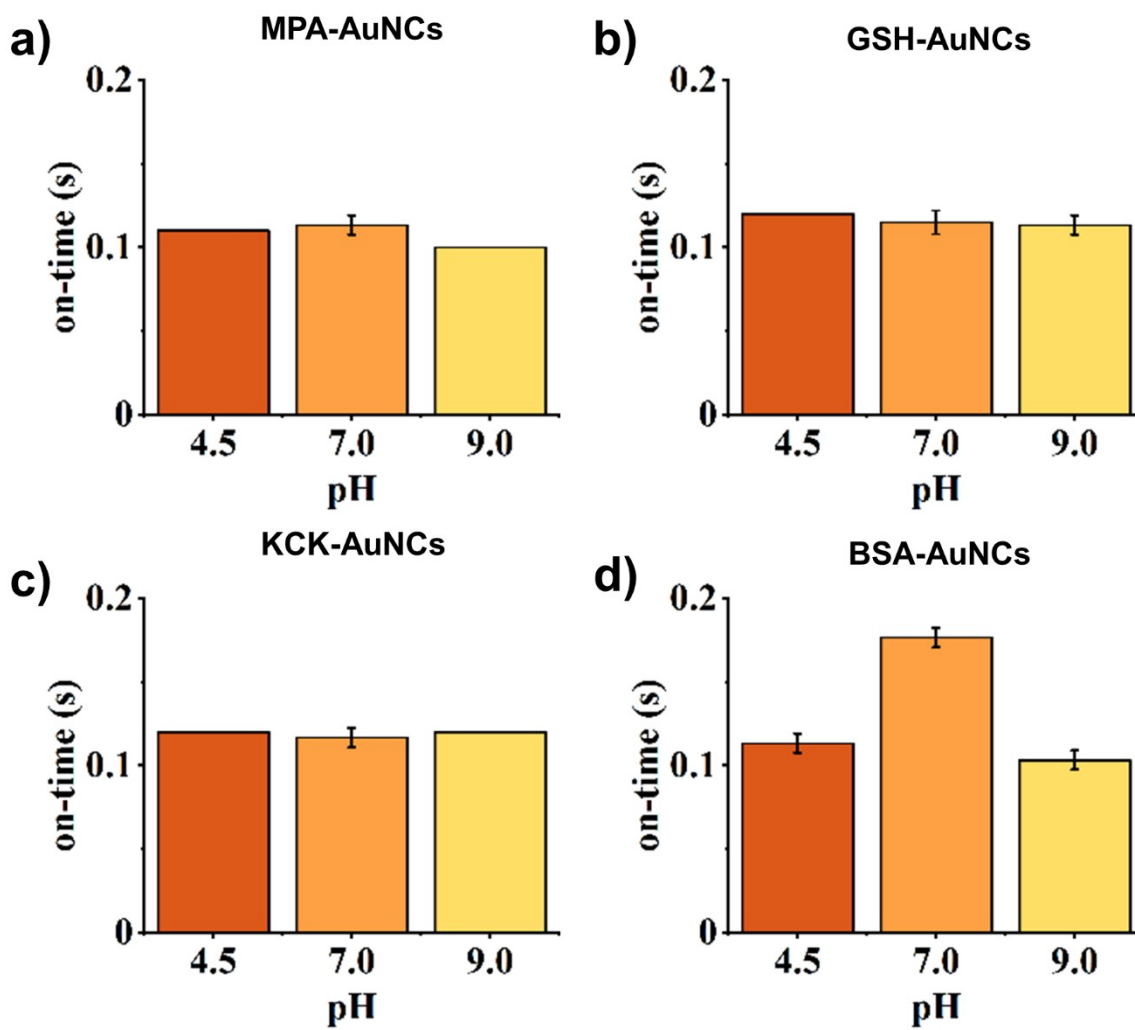

**Figure S14.** Changes in on-time during the single-molecule catalytic process for the four AuNCs at different pH values.

## REFERENCES

1. X. Yuan, N. Goswami, I. Mathews, Y. Yu and J. Xie, Enhancing stability through ligand-shell engineering: A case study with  $\text{Au}_{25}(\text{SR})_{18}$  nanoclusters, *Nano Res.*, 2015, **8**, 3488-3495.
2. M. Wang, Z. Wu, J. Yang, G. Wang, H. Wang and W. Cai,  $\text{Au}_{25}(\text{SG})_{18}$  as a fluorescent iodide sensor, *Nanoscale.*, 2012, **4**, 4087-4090; Y. Shichibu, Y. Negishi, H. Tsunoyama, M. Kanehara, T. Teranishi and T. Tsukuda, Extremely high stability of glutathionate-protected  $\text{Au}_{25}$  clusters against core etching, *Small.*, 2007, **3**, 835-839.
3. J. Xie, Y. Zheng and J. Y. Ying, Protein-Directed Synthesis of Highly Fluorescent Gold Nanoclusters, *J. Am. Chem. Soc.*, 2009, **131**, 888-889.
